# Supplementary material for: Enriched phenotypes in rare variant carriers suggest pathogenic mechanisms in rare disease patients
Source: Springer Nature journal article supplement (doi:10.1186/s13040-024-00418-5), 2025-01-17
Supplement: MOESM1 [file 13040_2024_418_MOESM1_ESM.pdf › 13040_2024_418_MOESM1_ESM.pdf]

Supplemental Table 1: Seizure and Seizure-Related HPO Terms

| <b>HPO</b> | <b>Name</b>                                    |
|------------|------------------------------------------------|
| HP:0001250 | Seizure                                        |
| HP:0007359 | Focal-onset seizure                            |
| HP:0033259 | Non-motor seizure                              |
| HP:0032679 | Focal non-motor seizure                        |
| HP:0020219 | Motor seizure                                  |
| HP:0011146 | Dialeptic seizure                              |
| HP:0011153 | Focal motor seizure                            |
| HP:0002384 | Focal impaired awareness seizure               |
| HP:0002349 | Focal aware seizure                            |
| HP:0032680 | Focal cognitive seizure                        |
| HP:0032716 | Focal impaired awareness non-motor seizure     |
| HP:0032682 | Focal aware non-motor seizure                  |
| HP:0032807 | Neonatal seizure                               |
| HP:0032808 | Neonatal seizure with electrographic correlate |
| HP:0002133 | Status epilepticus                             |
| HP:0032809 | Neonatal electro-clinical seizure              |
| HP:0011154 | Focal autonomic seizure                        |
| HP:0032898 | Focal automatism seizure                       |
| HP:0011157 | Focal sensory seizure                          |
| HP:0032712 | Focal impaired awareness motor seizure         |
| HP:0020217 | Focal aware motor seizure                      |
| HP:0025613 | Focal emotional seizure                        |

|            |                                             |
|------------|---------------------------------------------|
| HP:0032813 | Neonatal electro-clinical motor seizure     |
| HP:0002197 | Generalized-onset seizure                   |
| HP:0032756 | Focal impaired awareness cognitive seizure  |
| HP:0032681 | Focal aware cognitive seizure               |
| HP:0032677 | Generalized-onset motor seizure             |
| HP:0020207 | Reflex seizure                              |
| HP:0020221 | Clonic seizure                              |
| HP:0032755 | Focal impaired awareness autonomic seizure  |
| HP:0032909 | Focal impaired awareness automatism seizure |
| HP:0032740 | Focal aware autonomic seizure               |
| HP:0032910 | Focal aware automatism seizure              |
| HP:0032794 | Myoclonic seizure                           |
| HP:0032787 | Focal impaired awareness sensory seizure    |
| HP:0002266 | Focal clonic seizure                        |
| HP:0032754 | Focal aware sensory seizure                 |
| HP:0032892 | Infection-related seizure                   |
| HP:0032746 | Focal impaired awareness emotional seizure  |
| HP:0032734 | Focal aware emotional seizure               |
| HP:0002069 | Bilateral tonic-clonic seizure              |
| HP:0032894 | Seizure precipitated by febrile infection   |
| HP:0002121 | Generalized non-motor (absence) seizure     |
| HP:0011097 | Epileptic spasm                             |
| HP:0032792 | Tonic seizure                               |

|            |                                                               |
|------------|---------------------------------------------------------------|
| HP:0032825 | Neonatal electro-clinical sequential seizure                  |
| HP:0032815 | Neonatal electro-clinical myoclonic seizure                   |
| HP:0012004 | Focal cognitive seizure with deja vu/jamais vu                |
| HP:0010819 | Atonic seizure                                                |
| HP:0020216 | Visually-induced seizure                                      |
| HP:0032821 | Neonatal electro-clinical tonic seizure                       |
| HP:0032829 | Neonatal electro-clinical motor seizure with automatism       |
| HP:0032814 | Neonatal electro-clinical clonic seizure                      |
| HP:0002123 | Generalized myoclonic seizure                                 |
| HP:0011166 | Focal myoclonic seizure                                       |
| HP:0002373 | Febrile seizure (within the age range of 3 months to 6 years) |
| HP:0011145 | Symptomatic seizures                                          |
| HP:0033052 | Psychogenic non-epileptic seizure                             |
| HP:0032812 | Neonatal electro-clinical non-motor seizure                   |
| HP:0032903 | Focal vocal automatism seizure                                |
| HP:0032904 | Focal verbal automatism seizure                               |
| HP:0032907 | Focal undressing automatism seizure                           |
| HP:0011167 | Focal tonic seizure                                           |
| HP:0032905 | Focal sexual automatism seizure                               |
| HP:0011165 | Focal sensory seizure with visual features                    |
| HP:0032759 | Focal sensory seizure with vestibular features                |
| HP:0011163 | Focal sensory seizure with somatosensory features             |
| HP:0011161 | Focal sensory seizure with olfactory features                 |

|            |                                                 |
|------------|-------------------------------------------------|
| HP:0032760 | Focal sensory seizure with hot-cold sensations  |
| HP:0011160 | Focal sensory seizure with gustatory features   |
| HP:0032810 | Focal sensory seizure with cephalic sensation   |
| HP:0011158 | Focal sensory seizure with auditory features    |
| HP:0032902 | Focal perseverative automatism seizure          |
| HP:0032901 | Focal pedal automatism seizure                  |
| HP:0032899 | Focal orofacial automatism seizure              |
| HP:0011175 | Focal motor seizure with version                |
| HP:0032721 | Focal motor seizure with paresis/paralysis      |
| HP:0032846 | Focal motor seizure with negative myoclonus     |
| HP:0032718 | Focal motor seizure with dystonia               |
| HP:0032720 | Focal motor seizure with dysarthria/anarthria   |
| HP:0032900 | Focal manual automatism seizure                 |
| HP:0032725 | Focal impaired awareness clonic seizure         |
| HP:0011174 | Focal hyperkinetic seizure                      |
| HP:0007332 | Focal hemifacial clonic seizure                 |
| HP:0006813 | Focal hemiclonic seizure                        |
| HP:0032906 | Focal head nodding automatism seizure           |
| HP:0032729 | Focal emotional seizure with pleasure           |
| HP:0032737 | Focal emotional seizure with paranoia           |
| HP:0010821 | Focal emotional seizure with laughing           |
| HP:0032739 | Focal emotional seizure with fear/anxiety/panic |
| HP:0010820 | Focal emotional seizure with crying             |

|            |                                                              |
|------------|--------------------------------------------------------------|
| HP:0032736 | Focal emotional seizure with anger                           |
| HP:0032727 | Focal emotional seizure with agitation                       |
| HP:0032696 | Focal cognitive seizure with receptive dysphasia/aphasia     |
| HP:0032693 | Focal cognitive seizure with neglect                         |
| HP:0032687 | Focal cognitive seizure with memory impairment               |
| HP:0032700 | Focal cognitive seizure with left-right confusion            |
| HP:0012008 | Focal cognitive seizure with illusion                        |
| HP:0012007 | Focal cognitive seizure with hallucination                   |
| HP:0032692 | Focal cognitive seizure with forced thinking                 |
| HP:0032702 | Focal cognitive seizure with expressive dysphasia/aphasia    |
| HP:0032694 | Focal cognitive seizure with dyslexia/alexia                 |
| HP:0032699 | Focal cognitive seizure with dysgraphia/agraphia             |
| HP:0032691 | Focal cognitive seizure with dyscalculia/acalculia           |
| HP:0032689 | Focal cognitive seizure with dissociation                    |
| HP:0032698 | Focal cognitive seizure with conduction dysphasia/aphasia    |
| HP:0032685 | Focal cognitive seizure with auditory agnosia                |
| HP:0032701 | Focal cognitive seizure with anomia                          |
| HP:0032715 | Focal bilateral motor seizure                                |
| HP:0011173 | Focal behavior arrest seizure                                |
| HP:0032711 | Focal aware clonic seizure                                   |
| HP:0032765 | Focal autonomic seizure with urge to urinate/defecate        |
| HP:0032763 | Focal autonomic seizure with pupillary dilation/constriction |
| HP:0032767 | Focal autonomic seizure with piloerection                    |

|            |                                                                                                    |
|------------|----------------------------------------------------------------------------------------------------|
| HP:0032773 | Focal autonomic seizure with palpitations/tachycardia/bradycardia/asystole                         |
| HP:0032762 | Focal autonomic seizure with pallor/flushing                                                       |
| HP:0032771 | Focal autonomic seizure with lacrimation                                                           |
| HP:0032766 | Focal autonomic seizure with hypoventilation/hyperventilation/altered respiration                  |
| HP:0032764 | Focal autonomic seizure with erection                                                              |
| HP:0011159 | Focal autonomic seizure with epigastric sensation/nausea/vomiting/other gastrointestinal phenomena |
| HP:0020220 | Focal atonic seizure                                                                               |
| HP:0025190 | Bilateral tonic-clonic seizure with generalized onset                                              |
| HP:0011147 | Typical absence seizure                                                                            |
| HP:0032795 | Generalized myoclonic-tonic-clonic seizure                                                         |
| HP:0032678 | Eyelid myoclonia seizure                                                                           |
| HP:0011172 | Complex febrile seizure                                                                            |
| HP:0007334 | Bilateral tonic-clonic seizure with focal onset                                                    |
| HP:0020215 | Thinking-induced seizure                                                                           |
| HP:0020214 | Startle-induced seizure                                                                            |
| HP:0020213 | Somatosensory-induced seizure                                                                      |
| HP:0011171 | Simple febrile seizure                                                                             |
| HP:0033349 | Seizure cluster                                                                                    |
| HP:0032665 | Repeated focal motor seizures                                                                      |
| HP:0500173 | Reflex asystolic syncope                                                                           |
| HP:0020212 | Reading-induced seizure                                                                            |
| HP:0033053 | Pseudoseizure                                                                                      |
| HP:0020211 | Proprioceptive-induced seizure                                                                     |

|            |                                                        |
|------------|--------------------------------------------------------|
| HP:0020210 | Praxis-induced seizure                                 |
| HP:0007207 | Photosensitive tonic-clonic seizure                    |
| HP:0032855 | Photosensitive myoclonic-tonic-clonic seizure          |
| HP:0001327 | Photosensitive myoclonic seizure                       |
| HP:0031951 | Nocturnal seizures                                     |
| HP:0032834 | Neonatal seizure with unilateral automatism            |
| HP:0032835 | Neonatal seizure with bilateral symmetric automatism   |
| HP:0032830 | Neonatal seizure with bilateral asymmetric automatism  |
| HP:0032816 | Neonatal multifocal myoclonic seizure                  |
| HP:0032820 | Neonatal multifocal clonic seizure                     |
| HP:0032824 | Neonatal focal tonic seizure                           |
| HP:0032817 | Neonatal focal myoclonic seizure                       |
| HP:0032818 | Neonatal focal clonic seizure                          |
| HP:0032811 | Neonatal electrographic only seizure                   |
| HP:0032823 | Neonatal electro-clinical seizure with behavior arrest |
| HP:0032822 | Neonatal electro-clinical autonomic seizure            |
| HP:0032828 | Neonatal bilateral symmetric tonic seizure             |
| HP:0032836 | Neonatal bilateral symmetric myoclonic seizure         |
| HP:0032819 | Neonatal bilateral clonic seizure                      |
| HP:0032831 | Neonatal bilateral asymmetric tonic seizure            |
| HP:0032832 | Neonatal bilateral asymmetric myoclonic seizure        |
| HP:0011150 | Myoclonic absence seizure                              |
| HP:0032896 | Music-induced seizure                                  |

|            |                                                                           |
|------------|---------------------------------------------------------------------------|
| HP:0031165 | Multifocal seizures                                                       |
| HP:0032827 | Multifocal neonatal sequential seizure                                    |
| HP:0032786 | Migrating focal seizure                                                   |
| HP:0100622 | Maternal seizure                                                          |
| HP:0002173 | Hypoglycemic seizures                                                     |
| HP:0002199 | Hypocalcemic seizures                                                     |
| HP:0020209 | Hot water-induced seizure                                                 |
| HP:0010818 | Generalized tonic seizure                                                 |
| HP:0011170 | Generalized myoclonic-atonic seizure                                      |
| HP:0011169 | Generalized clonic seizure                                                |
| HP:0032887 | Generalized atonic seizure                                                |
| HP:0032893 | Gastroenteritis-related afebrile seizure                                  |
| HP:0032662 | Focal-onset seizure evolving into bilateral convulsive status epilepticus |
| HP:0011168 | Focal seizure with eyelid myoclonia                                       |
| HP:0032826 | Focal neonatal sequential seizure                                         |
| HP:0032923 | Focal impaired awareness vocal automatism seizure                         |
| HP:0032924 | Focal impaired awareness verbal automatism seizure                        |
| HP:0032927 | Focal impaired awareness undressing automatism seizure                    |
| HP:0032724 | Focal impaired awareness tonic seizure                                    |
| HP:0032925 | Focal impaired awareness sexual automatism seizure                        |
| HP:0032806 | Focal impaired awareness sensory seizure with visual features             |
| HP:0032805 | Focal impaired awareness sensory seizure with vestibular features         |
| HP:0032890 | Focal impaired awareness sensory seizure with somatosensory features      |



|            |                                                                   |
|------------|-------------------------------------------------------------------|
| HP:0032804 | Focal impaired awareness sensory seizure with olfactory features  |
| HP:0032853 | Focal impaired awareness sensory seizure with hot-cold sensations |
| HP:0032897 | Focal impaired awareness sensory seizure with gustatory features  |
| HP:0032878 | Focal impaired awareness sensory seizure with cephalic sensation  |
| HP:0032880 | Focal impaired awareness sensory seizure with auditory features   |
| HP:0032879 | Focal impaired awareness seizure with dissociation at onset       |
| HP:0032922 | Focal impaired awareness perseverative automatism seizure         |
| HP:0032921 | Focal impaired awareness pedal automatism seizure                 |
| HP:0032918 | Focal impaired awareness orofacial automatism seizure             |
| HP:0032730 | Focal impaired awareness myoclonic seizure                        |
| HP:0032713 | Focal impaired awareness motor seizure with version               |
| HP:0032859 | Focal impaired awareness motor seizure with paresis/paralysis     |
| HP:0032858 | Focal impaired awareness motor seizure with negative myoclonus    |
| HP:0032717 | Focal impaired awareness motor seizure with dystonia              |
| HP:0032719 | Focal impaired awareness motor seizure with dysarthria/anarthria  |
| HP:0032920 | Focal impaired awareness manual automatism seizure                |
| HP:0032726 | Focal impaired awareness hyperkinetic seizure                     |
| HP:0032847 | Focal impaired awareness hemifacial clonic seizure                |
| HP:0032799 | Focal impaired awareness hemiclonic seizure                       |
| HP:0032926 | Focal impaired awareness head nodding automatism seizure          |
| HP:0032747 | Focal impaired awareness emotional seizure with pleasure          |
| HP:0032749 | Focal impaired awareness emotional seizure with paranoia          |
| HP:0032750 | Focal impaired awareness emotional seizure with laughing          |

|            |                                                                                 |
|------------|---------------------------------------------------------------------------------|
| HP:0032752 | Focal impaired awareness emotional seizure with fear/anxiety/panic              |
| HP:0032751 | Focal impaired awareness emotional seizure with crying                          |
| HP:0032748 | Focal impaired awareness emotional seizure with anger                           |
| HP:0032753 | Focal impaired awareness emotional seizure with agitation                       |
| HP:0032793 | Focal impaired awareness cognitive seizure with receptive dysphasia/aphasia     |
| HP:0032798 | Focal impaired awareness cognitive seizure with neglect                         |
| HP:0032801 | Focal impaired awareness cognitive seizure with memory impairment               |
| HP:0032796 | Focal impaired awareness cognitive seizure with left-right confusion            |
| HP:0032872 | Focal impaired awareness cognitive seizure with illusion                        |
| HP:0032885 | Focal impaired awareness cognitive seizure with hallucination                   |
| HP:0032888 | Focal impaired awareness cognitive seizure with forced thinking                 |
| HP:0032886 | Focal impaired awareness cognitive seizure with expressive dysphasia/aphasia    |
| HP:0032870 | Focal impaired awareness cognitive seizure with dyslexia/alexia                 |
| HP:0032803 | Focal impaired awareness cognitive seizure with dysgraphia/agraphia             |
| HP:0032802 | Focal impaired awareness cognitive seizure with dyscalculia/acalculia           |
| HP:0032882 | Focal impaired awareness cognitive seizure with deja vu/jamais vu               |
| HP:0032852 | Focal impaired awareness cognitive seizure with conduction dysphasia/aphasia    |
| HP:0032874 | Focal impaired awareness cognitive seizure with auditory agnosia                |
| HP:0032791 | Focal impaired awareness cognitive seizure with anomia                          |
| HP:0032714 | Focal impaired awareness bilateral motor seizure                                |
| HP:0032790 | Focal impaired awareness behavior arrest seizure                                |
| HP:0032774 | Focal impaired awareness autonomic seizure with urge to urinate/defecate        |
| HP:0032779 | Focal impaired awareness autonomic seizure with pupillary dilation/constriction |

|            |                                                                                                                       |
|------------|-----------------------------------------------------------------------------------------------------------------------|
| HP:0032772 | Focal impaired awareness autonomic seizure with piloerection                                                          |
| HP:0032788 | Focal impaired awareness autonomic seizure with palpitations/tachycardia/bradycardia/asystole                         |
| HP:0032777 | Focal impaired awareness autonomic seizure with pallor/flushing                                                       |
| HP:0032782 | Focal impaired awareness autonomic seizure with lacrimation                                                           |
| HP:0032775 | Focal impaired awareness autonomic seizure with hypoventilation/hyperventilation/altered respiration                  |
| HP:0032780 | Focal impaired awareness autonomic seizure with erection                                                              |
| HP:0032778 | Focal impaired awareness autonomic seizure with epigastric sensation/nausea/vomiting/other gastrointestinal phenomena |
| HP:0032728 | Focal impaired awareness atonic seizure                                                                               |
| HP:0032915 | Focal aware vocal automatism seizure                                                                                  |
| HP:0032916 | Focal aware verbal automatism seizure                                                                                 |
| HP:0032908 | Focal aware undressing automatism seizure                                                                             |
| HP:0032722 | Focal aware tonic seizure                                                                                             |
| HP:0032917 | Focal aware sexual automatism seizure                                                                                 |
| HP:0032851 | Focal aware sensory seizure with visual features                                                                      |
| HP:0032800 | Focal aware sensory seizure with vestibular features                                                                  |
| HP:0032884 | Focal aware sensory seizure with somatosensory features                                                               |
| HP:0032797 | Focal aware sensory seizure with olfactory features                                                                   |
| HP:0032877 | Focal aware sensory seizure with hot-cold sensations                                                                  |
| HP:0032889 | Focal aware sensory seizure with gustatory features                                                                   |
| HP:0032873 | Focal aware sensory seizure with cephalic sensation                                                                   |
| HP:0032864 | Focal aware sensory seizure with auditory features                                                                    |
| HP:0032914 | Focal aware perseverative automatism seizure                                                                          |
| HP:0032913 | Focal aware pedal automatism seizure                                                                                  |

|            |                                                                |
|------------|----------------------------------------------------------------|
| HP:0032911 | Focal aware orofacial automatism seizure                       |
| HP:0032758 | Focal aware myoclonic seizure                                  |
| HP:0032891 | Focal aware motor seizure with version                         |
| HP:0032732 | Focal aware motor seizure with paresis/paralysis               |
| HP:0032857 | Focal aware motor seizure with negative myoclonus              |
| HP:0032723 | Focal aware motor seizure with dystonia                        |
| HP:0032733 | Focal aware motor seizure with dysarthria/anarthria            |
| HP:0032912 | Focal aware manual automatism seizure                          |
| HP:0032731 | Focal aware hyperkinetic seizure                               |
| HP:0032854 | Focal aware hemifacial clonic seizure                          |
| HP:0032757 | Focal aware hemiclonic seizure                                 |
| HP:0032919 | Focal aware head nodding automatism seizure                    |
| HP:0032742 | Focal aware emotional seizure with pleasure                    |
| HP:0032741 | Focal aware emotional seizure with paranoia                    |
| HP:0032745 | Focal aware emotional seizure with laughing                    |
| HP:0032738 | Focal aware emotional seizure with fear/anxiety/panic          |
| HP:0032743 | Focal aware emotional seizure with crying                      |
| HP:0032735 | Focal aware emotional seizure with anger                       |
| HP:0032744 | Focal aware emotional seizure with agitation                   |
| HP:0032710 | Focal aware cognitive seizure with receptive dysphasia/aphasia |
| HP:0032848 | Focal aware cognitive seizure with neglect                     |
| HP:0032686 | Focal aware cognitive seizure with memory impairment           |
| HP:0032706 | Focal aware cognitive seizure with left-right confusion        |

|            |                                                                                                          |
|------------|----------------------------------------------------------------------------------------------------------|
| HP:0032704 | Focal aware cognitive seizure with illusion                                                              |
| HP:0032871 | Focal aware cognitive seizure with hallucination                                                         |
| HP:0032705 | Focal aware cognitive seizure with forced thinking                                                       |
| HP:0032850 | Focal aware cognitive seizure with expressive dysphasia/aphasia                                          |
| HP:0032707 | Focal aware cognitive seizure with dyslexia/alexia                                                       |
| HP:0032709 | Focal aware cognitive seizure with dysgraphia/agraphia                                                   |
| HP:0032690 | Focal aware cognitive seizure with dyscalculia/acalculia                                                 |
| HP:0032688 | Focal aware cognitive seizure with dissociation                                                          |
| HP:0032883 | Focal aware cognitive seizure with déjà vu/jamais vu                                                     |
| HP:0032876 | Focal aware cognitive seizure with conduction dysphasia/aphasia                                          |
| HP:0032684 | Focal aware cognitive seizure with auditory agnosia                                                      |
| HP:0032708 | Focal aware cognitive seizure with anomia                                                                |
| HP:0032856 | Focal aware bilateral motor seizure                                                                      |
| HP:0032789 | Focal aware behavior arrest seizure                                                                      |
| HP:0032781 | Focal aware autonomic seizure with urge to urinate/defecate                                              |
| HP:0032768 | Focal aware autonomic seizure with pupillary dilation/constriction                                       |
| HP:0032783 | Focal aware autonomic seizure with piloerection                                                          |
| HP:0032784 | Focal aware autonomic seizure with palpitations/tachycardia/bradycardia/asystole                         |
| HP:0032761 | Focal aware autonomic seizure with pallor/flushing                                                       |
| HP:0032776 | Focal aware autonomic seizure with lacrimation                                                           |
| HP:0032769 | Focal aware autonomic seizure with hypoventilation/hyperventilation/altered respiration                  |
| HP:0032770 | Focal aware autonomic seizure with erection                                                              |
| HP:0032785 | Focal aware autonomic seizure with epigastric sensation/nausea/vomiting/other gastrointestinal phenomena |

|            |                                                        |
|------------|--------------------------------------------------------|
| HP:0020218 | Focal aware atonic seizure                             |
| HP:0032895 | Febrile seizure outside the age of 3 months to 6 years |
| HP:0020208 | Eating-induced seizure                                 |
| HP:0011152 | Early onset absence seizures                           |
| HP:0006834 | Developmental stagnation at onset of seizures          |
| HP:0007193 | Bilateral tonic-clonic seizure on awakening            |
| HP:0032839 | Bilateral symmetric neonatal sequential seizure        |
| HP:0032837 | Bilateral asymmetric neonatal sequential seizure       |
| HP:0007270 | Atypical absence seizure                               |
| HP:0011149 | Absence seizure with eyelid myoclonia                  |
| HP:0012469 | Infantile Spasms                                       |
| HP:0200134 | Epileptic encephalopathy                               |
| HP:0100284 | EMG: myotonic discharges                               |
| HP:0032865 | Myoclonic absence status epilepticus                   |
| HP:0032845 | Focal aware epileptic spasms                           |
| HP:0032844 | Focal impaired awareness epileptic spasm               |
| HP:0032843 | Focal-onset epileptic spasm                            |
| HP:0032842 | Generalized-onset epileptic spasm                      |
| HP:0032841 | Neonatal bilateral asymmetric epileptic spasm          |
| HP:0032840 | Neonatal bilateral symmetric epileptic spasm           |
| HP:0032838 | Neonatal unilateral epileptic spasm                    |
| HP:0032833 | Neonatal epileptic spasm                               |
| HP:0032670 | Tonic status epilepticus                               |

|            |                                           |
|------------|-------------------------------------------|
| HP:0032666 | Hyperkinetic status epilepticus           |
| HP:0032660 | Convulsive status epilepticus             |
| HP:0032549 | Persistent asymmetrical tonic neck reflex |
| HP:0031954 | Dystonic gait                             |
| HP:0031435 | Monotonic speech                          |
| HP:0025097 | Eyelid myoclonus                          |
| HP:0012074 | Tonic pupil                               |
| HP:0007326 | Progressive choreoathetosis               |
| HP:0007166 | Paroxysmal dyskinesia                     |
| HP:0007098 | Paroxysmal choreoathetosis                |
| HP:0007000 | Morning myoclonic jerks                   |
| HP:0003730 | EMG: myotonic runs                        |
| HP:0002487 | Hyperkinetic movements                    |
| HP:0001336 | Myoclonus                                 |
| HP:0001332 | Dystonia                                  |
| HP:0001276 | Hypertonia                                |
| HP:0001266 | Choreoathetosis                           |
| HP:0000297 | Facial hypotonia                          |
